# Supplementary material for: Sensory Processing Abnormalities in Community-Dwelling Older Adults with Cognitive Impairment: A Mixed Methods Study
Source: PubMed Central journal article supplement — Gerontol Geriatr Med. 2022 Jan 8;8:23337214211068290. doi: 10.1177/23337214211068290 (PMC8744206; doi:10.1177/23337214211068290), 2022-01-08
Supplement: sj-pdf-1-ggm-10.1177_23337214211068290.pdf [file sj-pdf-1-ggm-10.1177_23337214211068290.pdf]

## Semi-structured interview guide.

1. Describe your relationship with the person who you care.
  - a) How did you meet?
  - b) How do you provide care for this person?
2. Describe the living situation and daily routines or rituals that you do with the person who you are caring for.
3. Describe some examples of how this person acts that you think is happening because of the dementia.
  - a) Do they have aggression or violent behaviors?
  - b) Does their behavior change throughout the day?
4. How do you respond if the person becomes upset?
5. Are there any behaviors that the person you are caring for displays that happen regularly or are persistent?
  - a) How often do you observe behaviors such as repetition, staring, touching, difficulty with transitions, over-arousal, etc.?
  - b) How do you and the person you are caring for cope with these behaviors?
  - c) Is there anything that helps to decrease unwanted behaviors or anything that makes them worse?
  - d) What is the environment/situation like before, during, and after?
